# Supplementary material
Source: Springer Nature journal article supplement (https://www.springermedizin.de/resource/supplementary/12936_2012_2627_MOESM1_ESM.pdf/9542834)
Supplement: MOESM1 [file 9542834]

**A - Ratio of change males**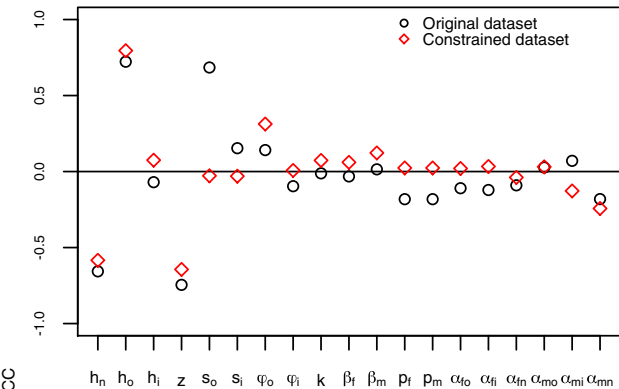**B - Ratio of change females**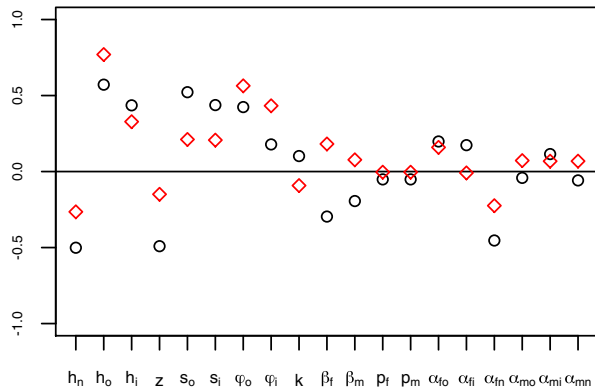**C - Mean fitness males**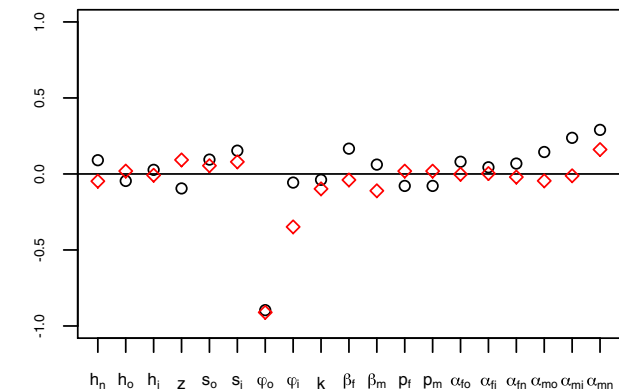**D - Mean fitness females**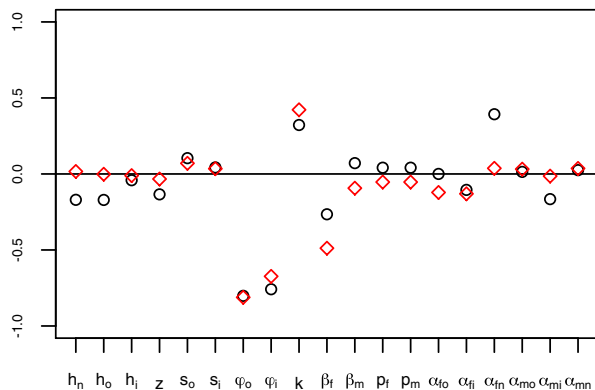

Parameters
